# Supplementary material for: Genetic Screening and Expression Analysis of Psychrophilic Bacillus spp. Reveal Their Potential to Alleviate Cold Stress and Modulate Phytohormones in Wheat
Source: PubMed Central journal article supplement (PMC6780275; doi:10.3390/microorganisms7090337), 2019-09-10
Supplement: microorganisms-07-00337-s001.pdf [file microorganisms-07-00337-s001.pdf]

**Table S1: DNA primers used in this study for detection of genes by PCR**

| No | Oligo Name        | Sequence 5' to 3'           |
|----|-------------------|-----------------------------|
| 1  | <i>DesR</i> (F)   | CGCCAGCCTGATGTATGTATTA      |
|    | <i>DesR</i> (R)   | CTGAGTTCCTGAGCGATTTCTT      |
| 2  | <i>SodA</i> (F)   | CACTGCTCTTGCCAACAAATC       |
|    | <i>SodA</i> (R)   | CCACTTCGTCCTCAGTTTACAA      |
| 3  | <i>DesK</i> (F)   | GCCTCCATTACTCTGTTTCAGTT     |
|    | <i>DesK</i> (R)   | TGAGATATTCTCGGGCCATTTCT     |
| 4  | <i>trxA</i> (F)   | CAGACTTCTGGGCTCCTTG         |
|    | <i>trxA</i> (R)   | TTGGTTTGAAGCCGACTGA         |
| 5  | <i>Res D</i> (F)  | GTAGTTGATGACGAAGCCAGAA      |
|    | <i>Res D</i> (R)  | CGGTGAGCATCATGGTCTATT       |
| 6  | <i>ohrR</i> (F)   | CCGCTGCTTGATAAGCTGAATA      |
|    | <i>ohrR</i> (R)   | CCCAGAATTGTCCCTGGAATG       |
| 7  | <i>DegS</i> (F)   | GAGGAAATCCGCAATGCTTATG      |
|    | <i>DegS</i> (R)   | CCTTCAGTTCGAACCCCTTTAC      |
| 8  | <i>ComA</i> (F)   | ACAGTCCTCAGTTTAGCGTTTAT     |
|    | <i>ComA</i> (R)   | AATCAGCGGCCACAAGAA          |
| 9  | <i>dpsU20</i> (F) | GCAGTGAACAAACAAGTAGCC       |
|    | <i>dpsU20</i> (R) | TGGATCGCAAGAAGCATGT         |
| 10 | <i>OpuAC</i> (F)  | AGCGCAGAGGAAATCCATAC        |
|    | <i>OpuAC</i> (R)  | CCCATCTTCACACCAGTCATAC      |
| 11 | <i>KatA</i> (F)   | ACCGTTGTTTCATCCGTTTCT       |
|    | <i>KatA</i> (R)   | CGAAGCTGTTAGGCTCGTAAT       |
| 12 | <i>PerR</i> (F)   | CGCATTACTCCTCAACGTCAT       |
|    | <i>PerR</i> (R)   | GCAGACGCCGTAATTTCTAAAC      |
| 13 | <i>acds</i> (F)   | ATGAACTSCARCGHTTY           |
|    | <i>acds</i> (R)   | TYARCCGTYS CGRAARRT         |
| 14 | <i>gdh</i> (F)    | TCTACAGGTTTGGGAAAATCAATGGCG |
|    | <i>gdh</i> (R)    | TTATCCGCGTCTGCTTGGAAATGA    |
| 15 | <i>pqqE</i> (F)   | GARCTGACYTAYCGCTGYCC        |
|    | <i>pqqE</i> (R)   | TSAGSAKRARSGCCTGR           |

**Table 2. qPCR primers for expression analysis used in this study.**

| No | Oligo Name       | Sequence 5' to 3'         |
|----|------------------|---------------------------|
| 1  | <i>cspB</i> (F)  | AGGTTTCGGATTCATCGAAGTAG   |
|    | <i>cspB</i> (R)  | TAGTAACGTTAGCAGCTTGTGG    |
| 2  | <i>cspC</i> (F)  | GGAACAAGGTACAGTTAAATGGTTT |
|    | <i>cspC</i> (R)  | CTTGCTCAACGTCAAACGATAC    |
| 3  | <i>cspD</i> (F)  | TGAAGTTGAAGGCCGAGAC       |
|    | <i>cspD</i> (R)  | ATTAGAAGCTTGAGGTCCACG     |
| 4  | <i>comA</i> (F)  | CTCACACCTAGAGAATGCCTG     |
|    | <i>comA</i> (R)  | CTGTATTCAATGGACCGCTTG     |
| 5  | <i>desK</i> (F)  | GAGGATGCAAATGAACGGATTG    |
|    | <i>desK</i> (R)  | TGCTTGTTCCGGATCTTTGTA     |
| 6  | <i>desR</i> (F)  | CCGGTTACTTTCAGAGAGCTATTA  |
|    | <i>desR</i> (R)  | GAGGGTTAGCTTCGCTGTATAA    |
| 7  | <i>ohrR</i> (F)  | CGGGAGATGACAAAGCAATACA    |
|    | <i>ohrR</i> (R)  | TTCGTTTAAAGCATCGGAGTGAG   |
| 8  | <i>OpuAC</i> (F) | AGCGCAGAGGAAATCCATAC      |
|    | <i>OpuAC</i> (R) | GACGTA CT CAGCAGCAACTT    |
| 9  | <i>ABARE</i> (F) | TTACACCGTGGAGCTTGAAG      |
|    | <i>ABARE</i> (R) | TTCACGTTCTCCTTGGACTG      |
| 10 | <i>4-HNE</i> (F) | CAAGTACCACTTCGACCTGAG     |

---

|    |                  |                                     |
|----|------------------|-------------------------------------|
|    | <i>4-HNE</i> (R) | CCTCTTGA <del>ACTGGATGTCGATG</del>  |
| 11 | <i>P5CS</i> (F)  | GATTCTCCGATGGTGCTCGT                |
|    | <i>P5CS</i> (R)  | TTCAACACCCACAGGTCCAC                |
| 12 | <i>ExpA1</i> (F) | TTGCTGATACAAGGAAGCTCTC              |
|    | <i>ExpA1</i> (R) | GTCGTAGAAGGTGGCATGG                 |
| 13 | <i>CKX2</i> (F)  | CGGGATAGGGTACAAGGAGTA               |
|    | <i>CKX2</i> (R)  | GTA <del>CTTGTCCCTTCATCTCCACG</del> |
| 14 | <i>ERF</i> (F)   | TGCCCTTCGATCTGAACATG                |
|    | <i>ERF</i> (R)   | TCCCACGAATCCTTGCTATTC               |
| 15 | <i>ARF</i> (F)   | AGATGTTCAGCACCTTCACC                |
|    | <i>ARF</i> (R)   | CAGTCTCCATCCTTGTCTTCG               |

---
